# Supplementary material for: Pre-clinical validation of B cell maturation antigen (BCMA) as a target for T cell immunotherapy of multiple myeloma
Source: PubMed Central journal article supplement (PMC5995247; doi:10.18632/oncotarget.25359), 2018-05-25
Supplement: oncotarget-09-25764-s001.pdf [file oncotarget-09-25764-s001.pdf]

## Pre-clinical validation of B cell maturation antigen (BCMA) as a target for T cell immunotherapy of multiple myeloma

### SUPPLEMENTARY MATERIALS

Supplementary Table 1: Demographic Characteristics of Subjects Analyzed in Figure 1B.

| Subject <sup>#</sup> | Sample Type | Gender | Age | Diagnosis            |
|----------------------|-------------|--------|-----|----------------------|
| 1                    | BM          |        |     | Multiple myeloma     |
| 2                    | PB          | F      | 61  | Plasma cell leukemia |
| 3                    | BM          | M      | 60  | Multiple myeloma     |
| 4                    | BM          | M      | 72  | Plasma cell leukemia |
| 5                    | PB          | F      | 53  | Plasma cell leukemia |
| 6                    | BM          | M      | 69  | Multiple myeloma     |
| 7                    | BM          | M      | 63  | Multiple myeloma     |
| 8                    | BM          | F      | 56  | Multiple myeloma     |
| 9                    | BM          | F      | 59  | Multiple myeloma     |
| 10                   | BM          |        |     | Multiple myeloma     |

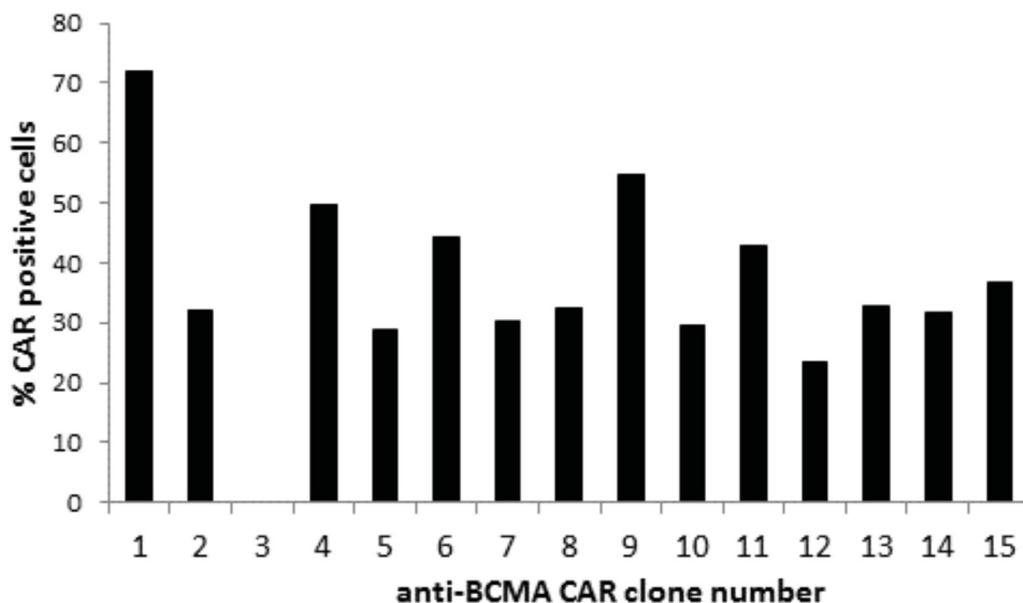

Supplementary Figure 1: Evaluation of the expression CAR constructs with antigen binding domains derived from the novel scFv sequences. The expression of the CAR clones on the surface of transduced T cells was evaluated by flow cytometry using recombinant BCMA as a detection reagent. Quantitation of CAR expression on the surface of primary T cells (% CAR+) is shown for each of the different CAR clones.

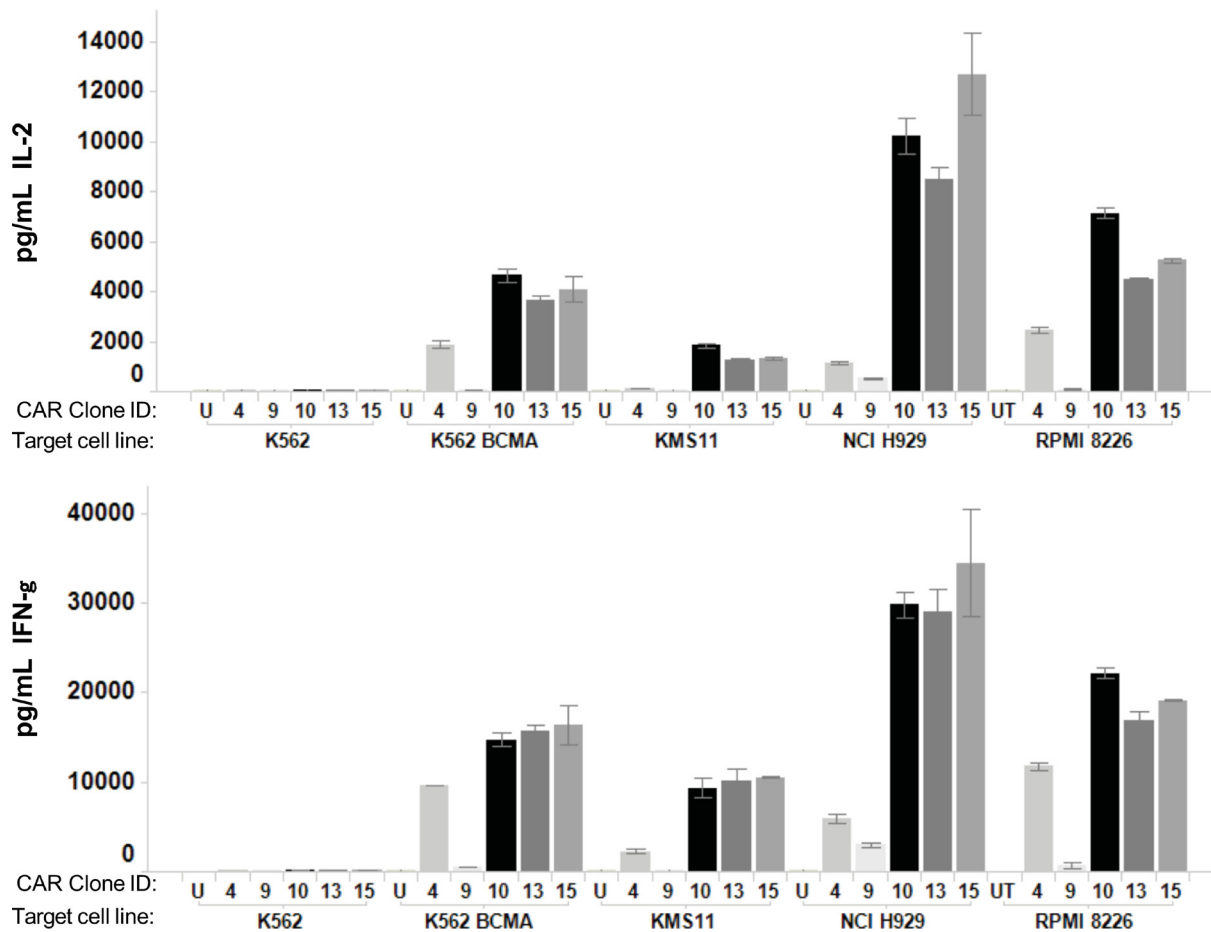

**Supplementary Figure 2: BCMA-specific cytokine production by individual CART-BCMA clones.** T cells expressing the indicated CAR constructs were evaluated for their ability to produce cytokines when co-cultured with antigen positive (K562-BCMA, KMS11-luc, NCI-H929, RPMI8226) and not antigen negative (K562) cell lines at an effector to target ratio of 2.5:1. Cytokines interleukin-2 (IL-2) and interferon-gamma (IFN- $\gamma$ ) were measured by MSD from supernatants collected from co-cultures of T cells with target cells. All data is expressed as the average  $\pm$  standard deviation.

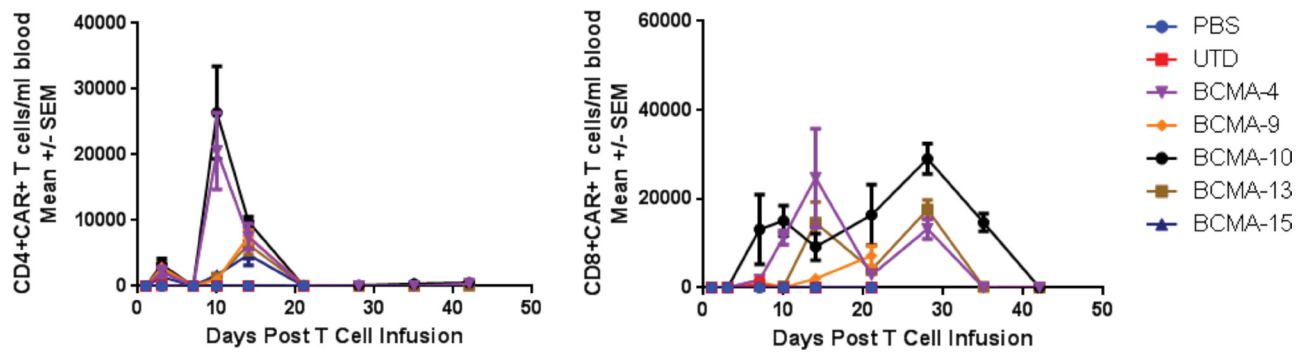

**Supplementary Figure 3: T cell engraftment in KMS11-luc in vivo model following CART-BCMA treatment.** The expansion of CART cells in the mice described in Figure 4E was determined by monitoring the presence of CAR+ cells in peripheral blood by flow cytometry. Cells were stained with anti-human CD45 and anti-murine CD11b to define human cells followed by anti-CD4 and anti-CD8 antibodies as well as with recombinant BCMA protein to detect CAR+ T cells. The number of CD4+ CAR+ T cells (left panel) and CD8+ CAR+ T cells (right panel) detected in blood over time is shown.

**A**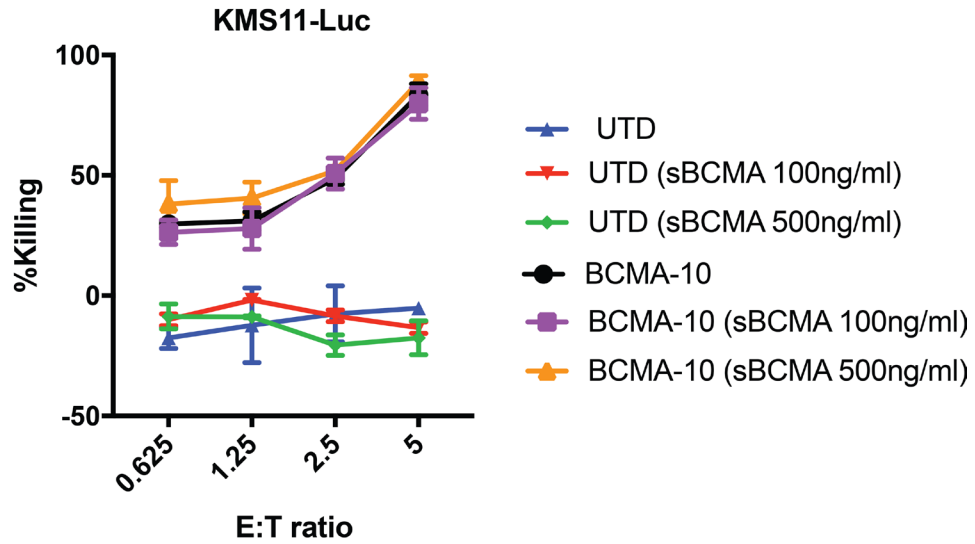**B**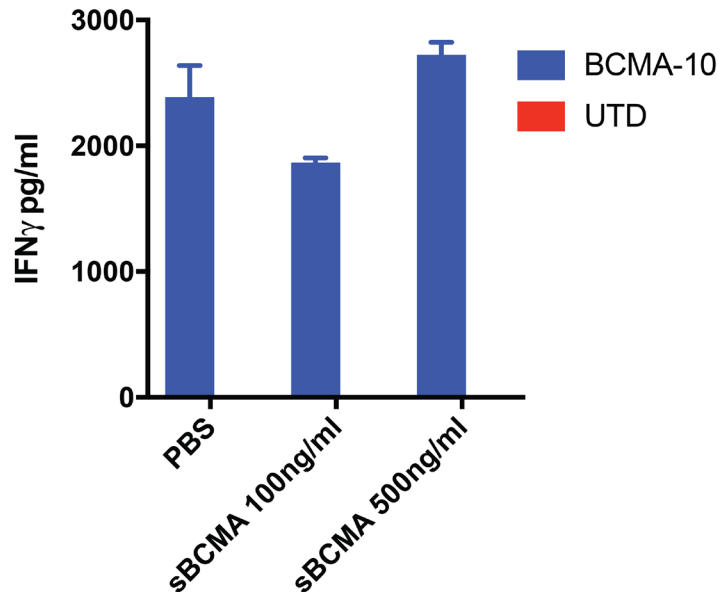

**Supplementary Figure 4: Clone 10 CAR-stimulated cytotoxicity and cytokine production are unaffected by up to 500 ng/mL of sBCMA.** (A) Specific cytotoxicity was measured as in Figure 4D by monitoring the level of luciferase produced by  $8 \times 10^3$  tumor target KMS11-Luc (T) cells at 16 h after incubation with effector UTD or BCMA-10 CART cells (E) at different E:T ratios. The mixed cell culture was either treated with PBS or sBCMA (BCMA-ECD [aa1-54], Novartis) at 100 or 500 ng/ml. (B) IFN $\gamma$  was measured by the Meso Scale Discovery (MSD; Gaithersburg, MD) Proinflammatory Panel 1 (human) Kit in these supernatants collected at 16 h from the co-culture system. Data are expressed as the mean  $\pm$  SD of triplicate samples from 1 of 2 donors, with similar results.

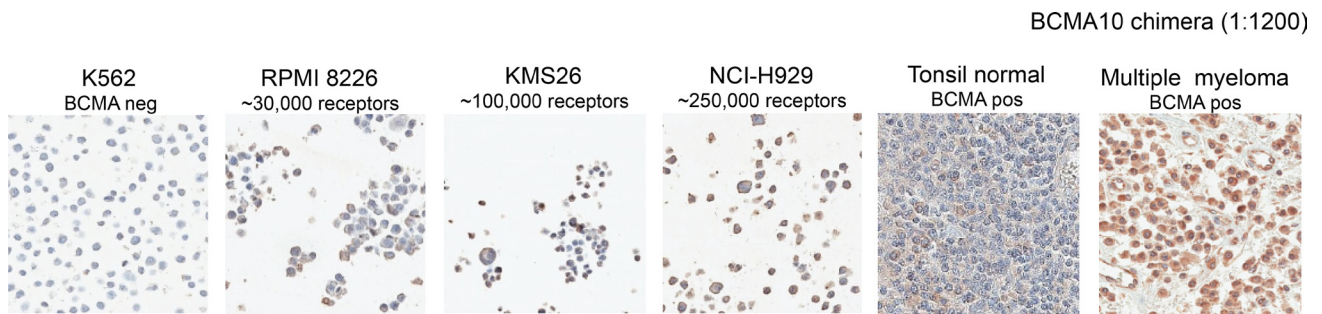

**Supplementary Figure 5: Detection of BCMA at varying surface densities using clone 10 scFv expressed as a full length chimeric antibody.** The indicated cell lines were cytospun onto glass slides and fixed in formaldehyde prior to IHC staining a chimeric antibody containing the clone 10 scFv. Normal tonsil and bone marrow with multiple myeloma were used as negative and positive controls, respectively. Staining shown was performed using 1:1200 dilution of the chimeric antibody, and an HRPconjugated, anti-rabbit secondary antibody.
